# Supplementary material
Source: PubMed Central journal article supplement (PMC3905686)
Supplement: NIHMS514906-supplement-1_si_001.pdf [file NIHMS514906-supplement-1_si_001.pdf]

Supporting Information:

**Controllable In-Situ Synthesis of Magnetite Coated Silica-Core  
Water-Dispersible Hybrid Nanomaterials**

Haiou Qu,<sup>\*,†</sup> Sheng Tong,<sup>§</sup> Kejing Song,<sup>⊥</sup> Hui Ma,<sup>†</sup> Gang Bao,<sup>§</sup> Seth Pincus,<sup>⊥</sup> Weilie Zhou,<sup>†</sup>  
Charles O'Connor<sup>\*,†</sup>

<sup>†</sup>Advanced Materials Research Institute, University of New Orleans, New Orleans, 70148  
United States

<sup>§</sup>Department of Biomedical Engineering, Georgia Institute of Technology and Emory  
University, Atlanta, Georgia 30332, United States

<sup>⊥</sup>Research Institute for Children, Children's Hospital, New Orleans, LA 70118 United States  
Email: haiou.qu@fda.hhs.gov; coconnor@uno.edu.

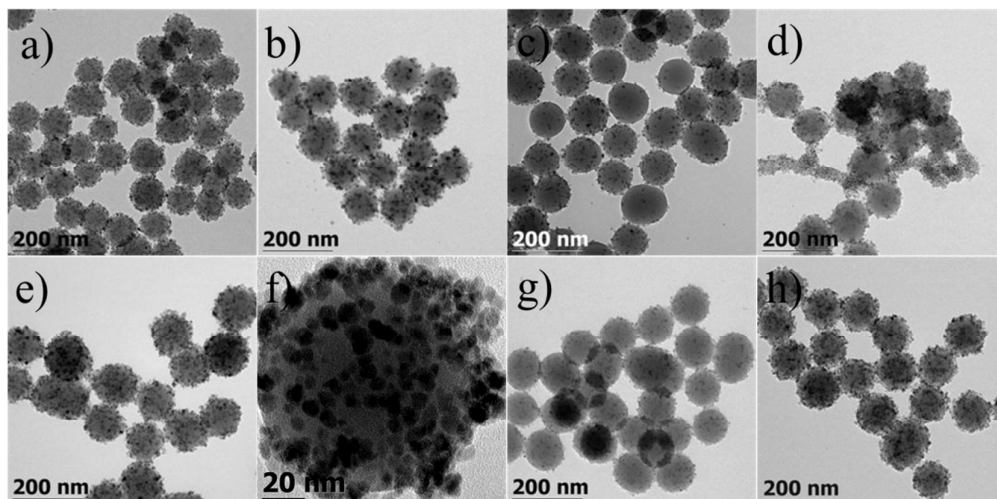

**Figure S1.** TEM images of 100 nm  $\text{Fe}_3\text{O}_4@\text{SiO}_2$  prepared under different iron precursor to silica weight ratio. (a) 1.77:1 (original ratio and concentration), (b) 1.77:2, (c) 1.77:3, (d) 1.77:0.5, (e) 3.54:1, (f) single  $\text{Fe}_3\text{O}_4@\text{SiO}_2$  prepared with a 3.54:1 iron precursor to silica ratio, (g) 0.88:1 (h) original ratio and concentration (1.77:1) and refluxing time was decreased from 3h to 1h. Note: the volume of TEG solvent was 10 ml in all preparations.

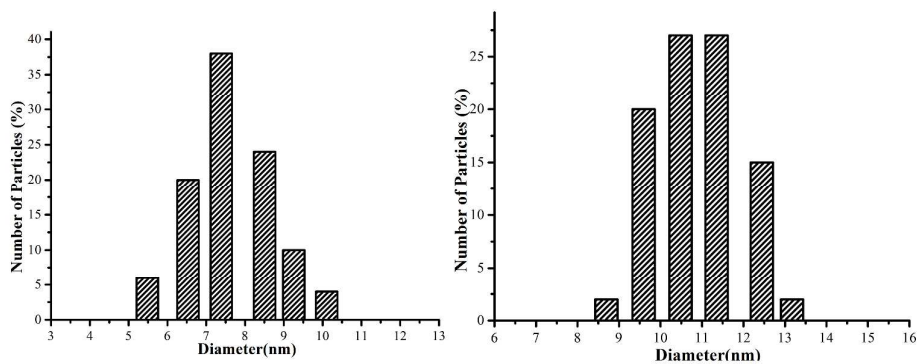

**Figure S2.** Histogram of magnetite nanocrystals on silica surface prepared with iron precursor to silica ratio (a) 1.77:1 (original ratio and concentration), (b) 3.54:1.

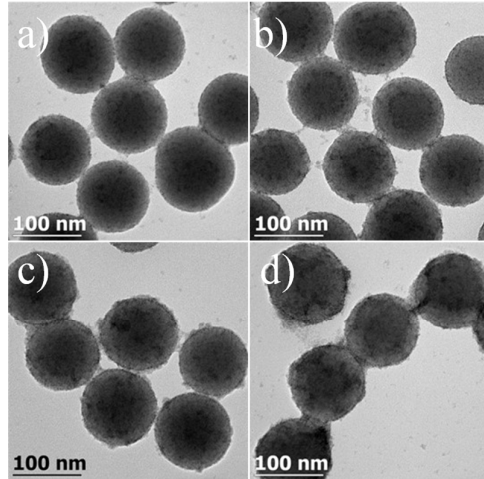

**Figure S3.** TEM images of samples taken at different intermediates. (a) 140 °C, (b) 180 °C, (c) 210 °C, (d) after 45 min at 210 °C.

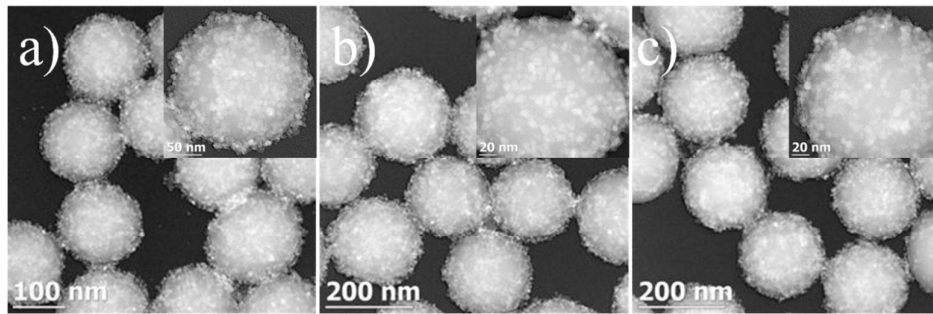

**Figure S4.** Electron microscopy images of 200 nm  $\text{Fe}_3\text{O}_4@\text{SiO}_2$  (a) as-prepared, (b) sonication for 1h, (c) sonication for 5h (Insets: higher magnification)

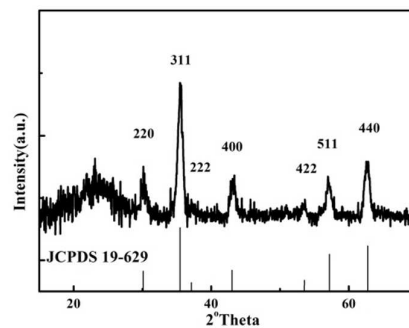

**Figure S5.** X-ray diffraction patterns of  $\text{Fe}_3\text{O}_4@\text{SiO}_2$  with standard reference magnetite (JCPDS No. 19-0629)

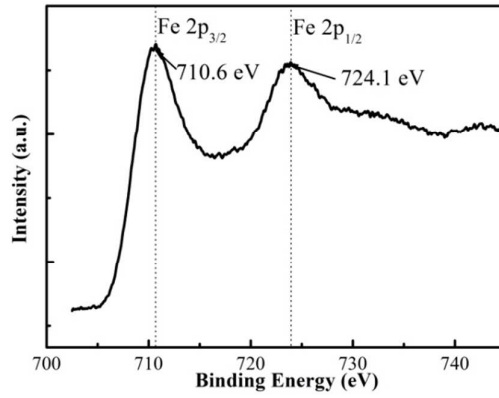

**Figure S6.** A typical XPS spectra of Fe<sub>3</sub>O<sub>4</sub>@SiO<sub>2</sub> nanoparticles.

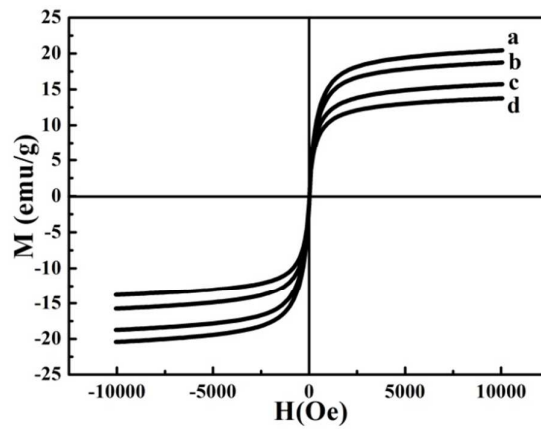

**Figure S7.** Room temperature hysteresis loops of (a) 60 nm, (b) 110 nm, (c) 300nm, (d) 400 nm Fe<sub>3</sub>O<sub>4</sub>@SiO<sub>2</sub>.

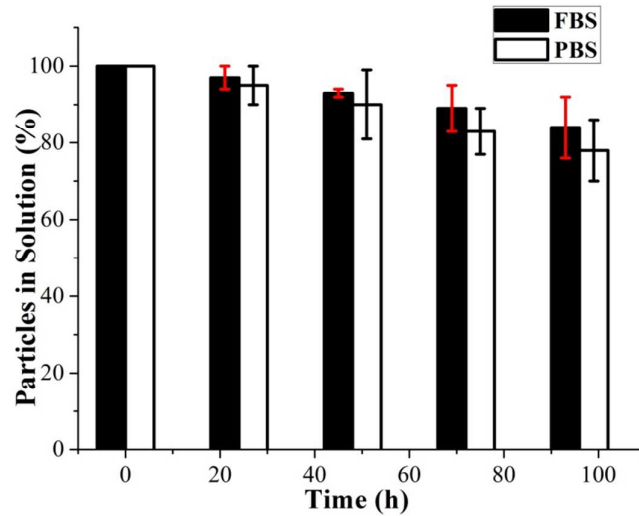

**Figure S8.** Stability of  $\text{Fe}_3\text{O}_4@\text{SiO}_2$  in PBS and Serum.

The stability of functionalized materials was studied in the sedimentation test. An amount of 1 mg of different sized  $\text{Fe}_3\text{O}_4@\text{SiO}_2$  was dispersed in 10 ml of pH 7 PBS buffer solution or bovine calf serum at room temperature. Sample solutions (upper level) were taken at different time interval after incubation. The iron concentrations were measured in ICP-AES. The Fe concentration of sample at 0 h was set to be 100%.

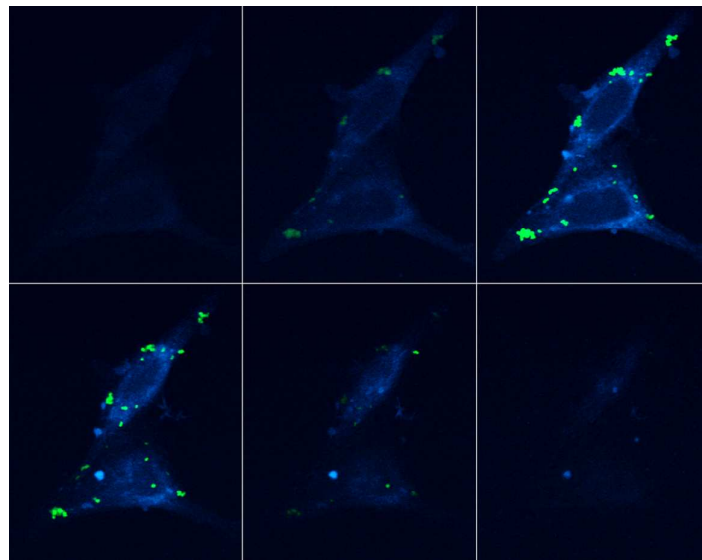

**Figure S9.** Confocal microscope images of HeLa cell treated with dye doped  $\text{Fe}_3\text{O}_4@\text{SiO}_2$  under sectioning mode. Cells were imaged from bottom to the top of the cells.

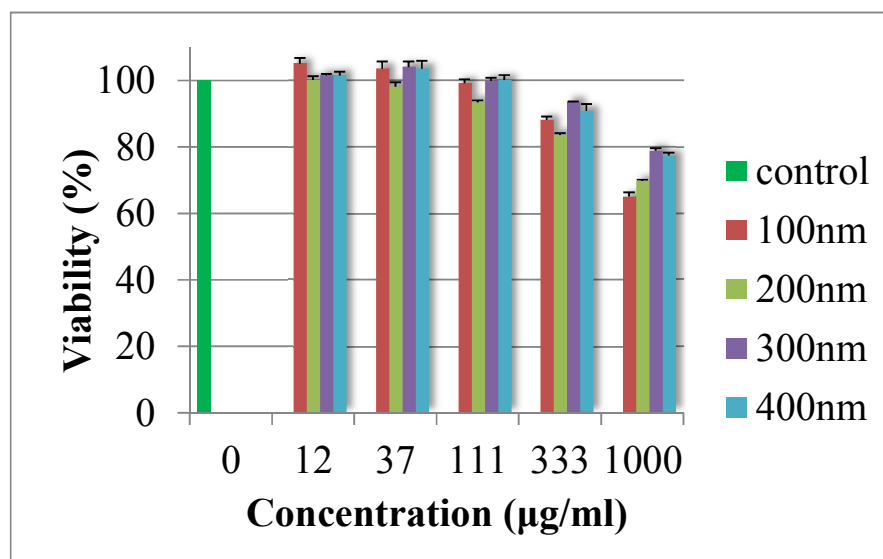

**Figure S10.** Cell viability test for Fe<sub>3</sub>O<sub>4</sub>@SiO<sub>2</sub> of variable sizes.
